# Supplementary material
Source: Royal Society of Chemistry journal article supplement (doi:10.1039/d6ta02138g)
Supplement: d6ta02138g1.pdf [file d6ta02138g1.pdf]

## Upgrading of Silicon Slag into Radiative Cooling Materials by Controlled Oxidation with Oxygen Carriers

Guodong Xiao,<sup>a</sup> Zhizheng Xiang,<sup>a</sup> Zhongqiu Tong,<sup>\*a</sup> Jie Yu,<sup>a</sup> Xingang Li,<sup>b</sup> Yueming Wang,<sup>\*b</sup> Shaoyuan Li,<sup>a</sup> Wenhui Ma,<sup>c</sup> Falin Wu,<sup>\*d</sup> Mikhail M. Mikhailov,<sup>\*e</sup>

<sup>a</sup> Faculty of Metallurgical and Energy Engineering, Kunming University of Science and Technology, Kunming 650093, Yunnan, China

<sup>b</sup> Jiangxi Construction Engineering Co. Ltd., Nancheng 330000, China

<sup>c</sup> School of Engineering, Yunnan University, Kunming, China

<sup>d</sup> Southwest Technology and Engineering Research Institute, China South Industries Group Corporation, Chongqing, 400050, China

<sup>e</sup> Tomsk State University of Control Systems and Radioelectronics, 634050, Lenina St., Tomsk, Russia

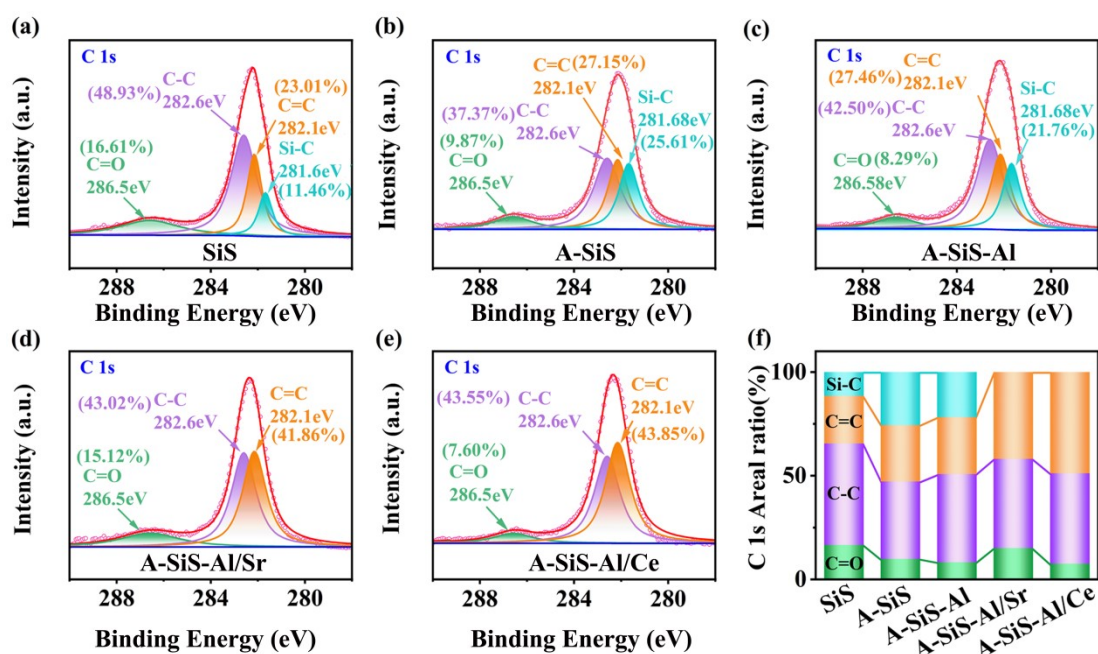

**Fig. S1.** C 1s XPS data of the TG tested SiS, A-SiS, A-SiS-Al, A-SiS-Al/Ce, and A-SiS-Al/Sr samples. (a) SiS sample. (b) A-SiS sample. (c) A-SiS-Al sample. (d) A-SiS-Al/Ce sample. (e) A-SiS-Al/Sr sample. (f) Areal ratio of various C 1s signals.

Oxidation of SiC with SrO<sub>x</sub> oxygen carrier

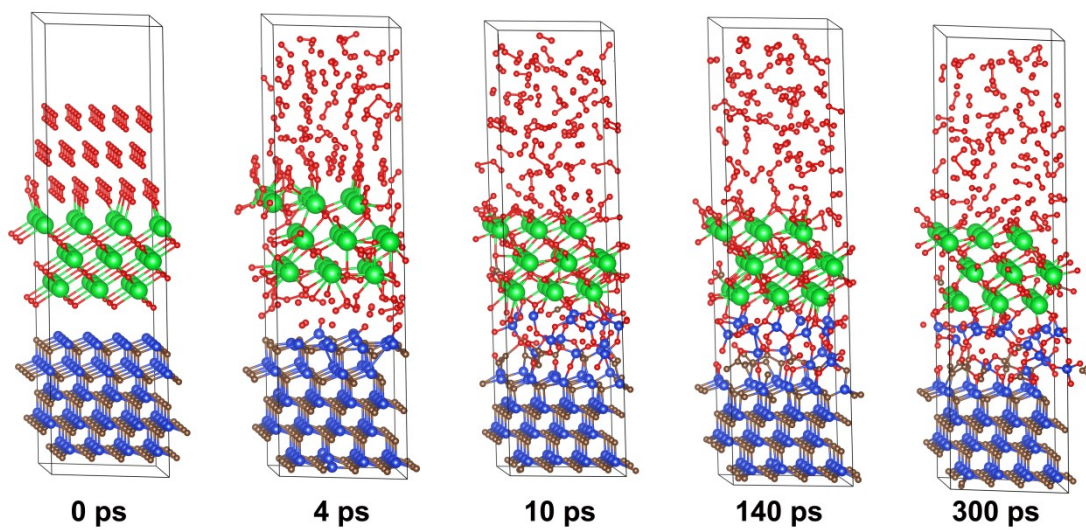

**Fig. S2.** Simulation of oxidation behaviors between the SiC and O<sub>2</sub> molecules with an oxygen carrier of SrO<sub>x</sub> interlayer.

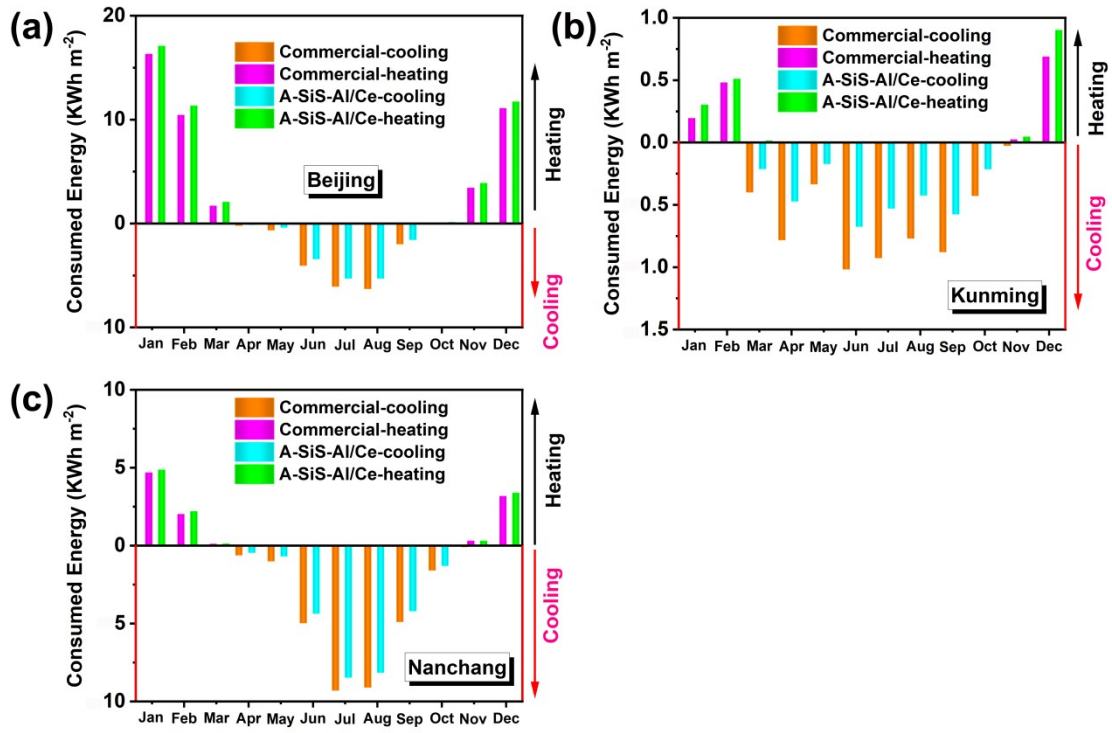

**Fig. S3.** (a) (b) (c) Simulated monthly consumed building energy in Beijing, Kunming and Nancheng, respectively.

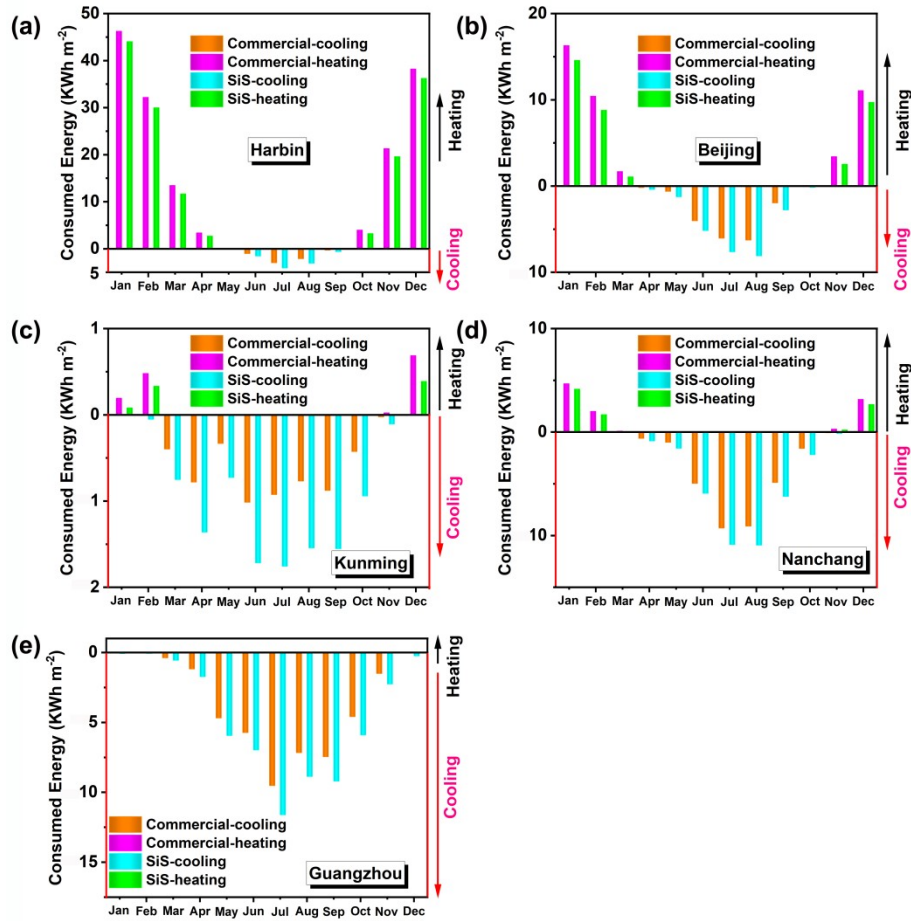

**Fig. S4.** (a) (b) (c) (d) (e) Simulated monthly consumed building energy in Harbin, Beijing, Kunming, Nancheng, and Nannchang, respectively.

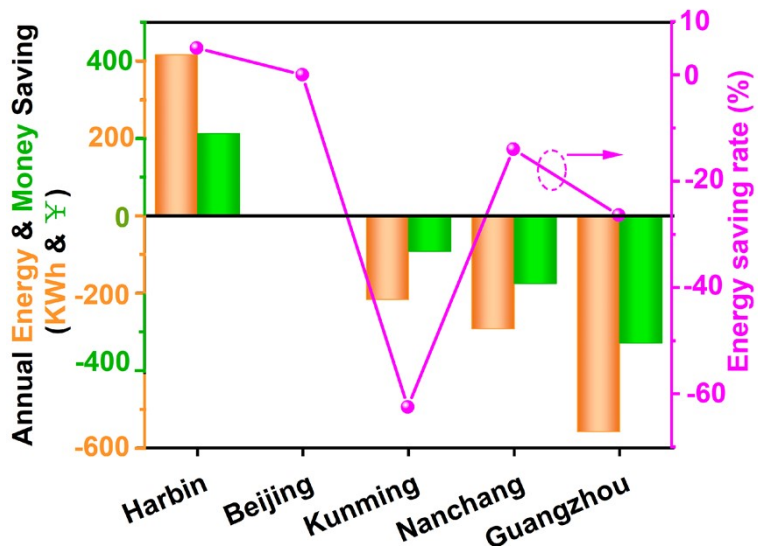

**Fig. S5.** Annual energy & money saving values in climatic regions of Harbin, Beijing, Kunming, Nancheng, and Guangzhou with the SiS membrane.

**Table S1.** The electricity prices in Harbin, Beijing, Nancheng, Kunming, and Guangzhou.

| City                        | Harbin | Beijing | Nancheng | Kunming | Guangzhou |
|-----------------------------|--------|---------|----------|---------|-----------|
| Electricity price (RMB/kWh) | 0.51   | 0.49    | 0.60     | 0.42    | 0.59      |
